# Supplementary material
Source: PubMed Central journal article supplement (PMC9908069)
Supplement: NIHMS1864598-supplement-Jones_PMID33999548_NEJM_2021_SupplAppendix.pdf [file NIHMS1864598-supplement-Jones_PMID33999548_NEJM_2021_SupplAppendix.pdf]

## Supplementary Appendix

This appendix has been provided by the authors to give readers additional information about their work.

Supplement to: Jones WS, Mulder H, Wruck LM, et al. Comparative effectiveness of aspirin dosing in cardiovascular disease. *N Engl J Med* 2021;384:1981-90. DOI: 10.1056/NEJMoa2102137

## Supplementary Appendix

|                                                                                                                                                                                                           |    |
|-----------------------------------------------------------------------------------------------------------------------------------------------------------------------------------------------------------|----|
| ADAPTABLE Study Committees, Members, and Investigators .....                                                                                                                                              | 2  |
| Supplementary Methods .....                                                                                                                                                                               | 6  |
| Table S1. Site Enrollment and Number of Participants Randomized to Each Study Group .....                                                                                                                 | 12 |
| Table S2. Expected study encounters and cumulative encounter completion rate .....                                                                                                                        | 14 |
| Table S3. Data Availability for study participants during the course of the study .....                                                                                                                   | 15 |
| Table S4. Data source where primary effectiveness end point was captured, based on treatment group... 16                                                                                                  |    |
| Table S5. Characteristics of participants at baseline.....                                                                                                                                                | 17 |
| Table S6. Treatment effect on participant-reported quality of life over time .....                                                                                                                        | 19 |
| Table S7. Primary effectiveness end point based on secondary randomization group (3 months vs. 6 months of follow-up) .....                                                                               | 21 |
| Table S8. Sensitivity analyses to assess impact of prior aspirin dose, non-adherence, COVID-19, and under-reporting of events and misclassification of events on the primary effectiveness end point..... | 22 |
| Figure S1. End point ascertainment and confirmation for non-fatal events.....                                                                                                                             | 23 |
| Figure S2. Participant data availability over trial follow-up.....                                                                                                                                        | 24 |
| Figure S3. Randomization, treatment, and follow-up of participants .....                                                                                                                                  | 25 |
| Figure S4. Time-to-event curves for all-cause mortality .....                                                                                                                                             | 26 |
| Figure S5. Analyses of heterogeneity of treatment effect for the primary effectiveness outcome .....                                                                                                      | 27 |
| Figure S6. Adherence to randomized study dose over time.....                                                                                                                                              | 28 |
| Figure S7. Sensitivity analysis to assess impact of under-reporting of events on primary efficacy analysis .....                                                                                          | 29 |
| Figure S8. Sensitivity analysis to assess impact of misclassification of events on primary efficacy analysis .....                                                                                        | 30 |

## **ADAPTABLE Study Committees, Members, and Investigators**

### **ADAPTABLE Executive Committee**

Robert A. Harrington, Stanford University (Co-Chair)

Russell Rothman, Vanderbilt University (Co-Chair)

Adrian F. Hernandez, Duke University

W. Schuyler Jones, Duke University

Lesley H. Curtis, Duke University

Greg Marcus, University of California-San Francisco

Henry Cruz, Patient Partner

Jacqueline Alikhaani, Patient Partner

### **ADAPTABLE Operations Team**

Adrian Hernandez (Co-Principal Investigator)

Matthew Roe (Co-Principal Investigator)

Schuyler Jones (Co-Principal Investigator)

Lisa Berdan (Clinical Operations Lead)

Holly Robertson (Project Leader)

Amber Sharlow (Clinical Research Associate)

Lesley Curtis (Data Coordinating Center Principal Investigator)

Brad Hammill (Biostatistician)

Debra Harris (Bioinformatics)

Laura Qualls (Bioinformatics)

Hillary Mulder (Lead Statistician)

Lisa Wruck (Senior Statistician)

Michael Pencina (Senior Statistician)

Guillaume Marquis-Gravel (Cardiology Fellow)

### **ADAPTABLE Data Safety Monitoring Board**

Clyde Yancy, Northwestern University (Chair)

Dave Demets, University of Wisconsin

Judith Hochman, New York University

Bernard Gersh, Mayo Clinic College of Medicine

Alice Jacobs, Boston Medical Center

Debbe McCall, Patient Representative

Hugo Campos, Patient Representative

### **ADAPTORS**

CAPriCORN: Desiree Davidson

GPC: Kevin Edgley

LHSNet: Greg Merritt

Mid-South (now STAR): Linda Brown

NYC: Henry Cruz

OneFl: Nadine Zemon

PaTH: Tom McCormick

pSCANNER: Jacqueline Alikhaani

REACHnet: Ken Gregoire

### **ADAPTABLE Clinical Data Research Network (CDRN) Principal Investigators**

CAPriCORN: Abel Kho, Northwestern University

Greater Plains Collaborative (GPC): Russ Waitman, University of Missouri

LHSNet: Veronique Roger, Mayo Clinic

Mid-South (now STAR): Russell Rothman, Vanderbilt University

NYC: Rainu Kaushal, Weill Cornell

OneFlorida: Elizabeth Shenkman, University of Florida Gainesville

PaTH: Kathleen McTigue, UPMC (formerly University of Pittsburgh Medical Center)

pSCANNER: Douglas Bell, University of California Los Angeles

REACHnet: Thomas Carton, Louisiana Public Health Institute

### **ADAPTABLE Site Study Teams**

#### **CAPriCORN**

**Northwestern:** A. Kho, M. Nodal, D. Fintel, F. Ahmad

**Rush:** A. Williams, R.C. Shah

**University of Chicago:** A. Flores, M. Jansen, T. Polonsky

#### **Greater Plains Collaborative (GPC)**

**Indiana:** D. Hood, J. French, P. Dexter

**Iowa:** D. Riley, N. Smith, S. Girotra

**Kansas:** R. Waitman, S. Chandaka, T. McMahon, K. Greening, Y. Murr, K. Munshi, H. Sandoval, K. Gupta

**Marshfield:** L. Verhagen, T. Foss, J. VanWormer

**Medical College of Wisconsin:** K. Osinski, A. Schwarz, S. Cornell, M. Berendt, J. Whittle

**Missouri:** A. Mosa, V. Mandhadi, L. Lawrence, A. Kumar, D. Mehr

**University of Nebraska Medical Center:** J. McClay, P. Guda, A. Wolfe, C. Geary, K. Ostlund, L. Larson, R. Harper, J. Campbell

**University of Texas Health Sciences Center (San Antonio):** L. Manuel, O. Suarez, J. Polanco, A. Tirado-Ramos, S. Tsai

**University of Texas-Southwestern:** J. Cai, M. Bell, P. Reeder, T. Bosler, K. Wilkinson, S. Antony, S. Das

### **Learning Health Systems Network (LHSNet)**

**Allina Health System:** K. Hanson, C. Rodgers, E. Ebere, S. Bradley, M. Miedema

**Essentia Health:** R. Thiel, B. Lemke, I. Haller, C. Benziger

**Intermountain:** S. Rea, D. Ward, H. Maestas, N. Garbe, L. Evans, P. Haug, K. Knowlton

**Mayo Clinic:** V. Roger, E. Koepsell, S. Brue, J. Bauman, B. Bucknell, H. Jouni,

**Ohio State University:** M. Jindra, J. Harper, M. Bright, B. Lampert, S. Fernandez, J. Ryan, S. Brougher

**University of Michigan:** M. Harris, A. Fishstom, L. Ferguson, D. Braswell, K. Shah, B. Nallamotheu, C. Friedman, D. Williams, P. Farrehi

### **MidSouth (now STAR)**

**Duke University:** W.S. Jones, J. Curtis, J. Hamill, B. O'Brien, M.B. Summers, X. Idriss, W. Pohlman

**University of North Carolina:** K. Thompson, D. Dewalt, R. Bradford

**Vanderbilt University:** T. Barber, D. Crenshaw, K. Goggins, W. Hucke, S. Kripalani, S. McCrate, J. Moore, D. Muñoz, C. O'Donnell, C. Pritchett, R. Rothman, C. Roumie, R. Servis, K. Worley

**Wake Forest University:** J. Borgman, L. Doomy, K. Blinson, G Rosenthal, L. Zhou

### **NYC**

**Montefiore:** O.A. Sandu, Y. Goldberg

**Mount Sinai:** E. Fass, D. McKee, J. Lin

**New York University:** C. Pulgarin, S. Blecker

**Weill Cornell:** R. Kaushal, A. Cohen, N. Goldberg, S. Chaudhary, A. LaMar, T. Haque, K. LaScalea, R. Kim, T. Champion

## **OneFlorida**

**University of Florida:** B. Shenkman, B. Roth, D. Bright, J. Hensley, T. Chou, J-A. Norton, C. Garrett, C. Pepine, D. Anderson, E. Handberg

**Bond Community Health Center:** B. Johnson, T. Robinson

**Florida Hospital:** D. Allen, M. Warrington, H. Seifein

**Orlando Health:** H. Noel, V.K. Kasi

## **PaTH**

**Johns Hopkins University:** D. Gumas, H. Lehmann, M. Gauvey-Kern, D. Ford, T. Metkus

**Penn State University:** J. McCullough, K. Confer, C. Chuang, J. Kraschnewski

**Temple:** M. Weiner, J. Turella, A. Paranjape

**UPMC:** K. McTigue, N. Cappella, P. Kant, A. Arita, E. Klawson, S. Jain

**University of Utah:** A. Huffman, C. Moynier, T. Greimes, B. Steinberg, R. Hess

## **pSCANNER**

**UCLA:** M. Zachariah, D. Bell, G. Fonarow

## **REACHnet**

**REACHnet Coordinating Center:** T. Carton, B. Nauman, L. Rudov

**Baylor Scott & White:** L. Hall, L. Clariday, R. Baker, P. McCullough

**Ochsner:** C. Parke, D. Rachal, R. Jenkins, S. Cohen, G. Liu, M. Effron, R. Re

**Tulane:** A. Irimpen

## **Other Contributors:**

**Health eHeart Patient Powered Research Network:** M. Pletcher, M. Faulkner

**HealthCore (Anthem subsidiary):** M. Cziraky, Q. Shi, A. Marshall, E.R. Kennedy, K. Haynes

**Humana:** V. Nair

## **Supplementary Methods**

### **Study Organization**

The statistical and data coordinating center at Duke Clinical Research Institute (Durham, NC) coordinated data collection and query resolution and performed all statistical analyses. The authors vouch for the accuracy and completeness of the data and all the analyses, as well as for the fidelity of this report to the study protocol and statistical analysis plan. The first author prepared the first draft of the manuscript, and all authors made the decision to submit the manuscript for publication.

The initial protocol was posted for public review and comment in July 2015, and questions about eligibility criteria were voted upon by key stakeholders, including patient-partners, site investigators, and research personnel. The final protocol was approved by the trial executive committee, the Duke University institutional review board (coordinating center), and by the institutional review boards providing oversight at participating centers. Prior to initiation, the United States Food and Drug Administration provided a letter to state that the clinical trial met the criteria for Investigational New Drug exemption in CFR 312.2(b).

**Role of the Funder/Sponsor:** PCORI approved the design and conduct of the study. They had no role in collection, management, analysis, and interpretation of the data; preparation, review, or approval of the manuscript; and decision to submit the manuscript for publication.

### **Inclusion/Exclusion Criteria**

The eligibility criteria for established ASCVD was defined by any of the following: (1) prior myocardial infarction; (2) prior coronary revascularization procedure (percutaneous coronary intervention or coronary-artery bypass grafting surgery); (3) prior coronary angiography demonstrating  $\geq 75\%$  stenosis of at least 1 epicardial coronary artery; or (4) history of chronic ischemic heart disease, coronary artery disease, or ASCVD. Exclusion criteria included a history of significant allergy to aspirin, history of gastrointestinal bleeding within 12 months, bleeding disorder that precluded aspirin use, current or planned use of an oral anticoagulant or ticagrelor, and female patients who were pregnant or nursing. There were no exclusion criteria for upper age limit, comorbid conditions, or other concomitant medications.

### **Enrichment Criteria**

Eligible patients were required to have at least 1 enrichment criterion: age  $\geq 65$  years, serum creatinine  $\geq 1.5$  mg/dL, diabetes mellitus, current cigarette smoking, cerebrovascular disease, peripheral artery

disease, heart failure (systolic or diastolic), left ventricular ejection fraction <50%, systolic blood pressure  $\geq 140$  mm Hg, or low density lipoprotein cholesterol  $\geq 130$  mg/dL.

### **Recruitment Strategies**

After applying the computable phenotype at enrolling centers, approximately 650,000 potentially eligible participants were identified for the study. Multimodal ‘high-touch’ (i.e., traditional, in-person contact) and ‘low-touch’ (i.e., electronic mail, standard mail, electronic health record messages, telephone calls) methods were utilized to approach potential participants for enrollment. Potentially eligible participants were provided a personalized access code that both allowed them access to the online patient portal and linked them to the enrolling health system. The patient portal was available in English and Spanish. Once connected to the patient portal, the patient was able to read about the study, watch an informational video, answer eligibility questions, answer 5 comprehension questions about the reasons and commitment to participate, and finally to sign the electronic informed consent form. In order to accommodate study participants who did not have access to the internet or did not feel comfortable with the technology, ‘non-internet’ participation was allowed and study personnel at enrolling centers facilitated enrollment using electronic tablets at clinic visits.

### **Retention Efforts**

During the course of the study, newsletters were distributed to the participants in which Adaptors wrote pieces that covered topics such as study medication adherence, interpretation of primary prevention studies, importance of completing study visits, and how to disseminate results. Additionally, all-site teleconferences were held monthly that provided study updates, addressed key questions, and provided a forum for investigators and researchers to discuss best practices as it related to the conduct of the study.

### **End Point Ascertainment and Validation**

Programming algorithms were developed by the data coordinating center and distributed to each entity to identify nonfatal outcomes using *International Classification of Diseases, Ninth Revision, Clinical Modification (ICD-9-CM)*, *International Classification of Diseases, Tenth Revision, Clinical Modification (ICD-10-CM)* and *Procedure Coding System (ICD-10-PCS)* codes. Death was captured from electronic health records, linkage to private and public health insurance claims data, and notifications from participants’ friends and family members. In some instances, participants had an end point prior to withdrawal of consent, and these end points were counted in the main analysis. In other instances, study centers were granted permission to ascertain death in those participants who withdrew consent from the study. Thus, the number of participants with data available for the primary analysis included some



participants who withdrew consent. Vital status was confirmed prior to study completion via multiple methods including electronic health record review, telephone calls from the Call Center, and internet searches. Participant-reported hospitalizations required confirmation by data from additional sources to ensure that these events qualified as study outcomes. In the event that patient-reported hospitalizations could not be reconciled with claims/codes from the data sources, medical records were obtained and reviewed by clinicians at the clinical coordinating center to confirm or refute the outcomes.

According to a pre-specified end point validation plan that was submitted to PCORI in 2017, we planned to adjudicate 225 non-fatal events, which turned out to be more than one-third of the overall non-fatal events. Prior literature suggested that myocardial infarction events that were reported by site investigators or were identified by claims data had high levels of agreement with formal clinical end point adjudication. Stroke events, because of some nuances with stroke symptoms, had not correlated as well with formal adjudication in prior studies. Clinicians at the Duke Clinical Research Institute reviewed hospital records for 194 (of planned 225) non-fatal end points (MI, stroke, major bleeding) that had been identified in the electronic health record data and performed formal adjudication of these events. The positive predictive value for these end points was 90.3% for MI, 71.6% for stroke, and 92.7% for major bleeding. When stroke was listed as the primary diagnosis code for hospitalizations, the positive predictive value was very high. The lower positive predictive value that was reported (71.6%) was mostly due to the fact that “stroke” was listed in a position other than the primary diagnosis for hospitalizations, and this represented patients with prior strokes rather than a mis-classification of stroke as a reason for hospitalization.

### **Aspirin Formulation After Randomization**

A total of 14,117 participants answered the question “Is your aspirin tablet enteric coated?” Of these responses, 3185 (22.6%) responded “Don’t Know,” 7371 (52.2%) responded “Yes,” 3318 (23.5%) responded “No,” and 243 (1.7%) left the form blank.

### **Secondary Analyses and Subgroup Analyses**

The treatment effect on quality of life outcomes over time was assessed using a mixed model with random slope and intercept. Model-based mean scores with standard error are presented at 6 month increments up to 2 years post-randomization. Treatment effects on the primary outcome and any interactions were tested in pre-specified subgroups that included age, race, sex, diabetes mellitus, chronic kidney disease (defined as serum creatinine >1.5 mg/dL), and use of oral P2Y12 inhibitor at baseline. Age was modeled as a natural cubic spline with 4 knots and the treatment effect was presented at 2 values of

age (60 and 70). An additional subgroup analysis was performed post-hoc evaluating the treatment effect of aspirin dose in patients with body weight < 70 kg and  $\geq$  70 kg (added to Figure S7).

### **Censoring Rules**

If a participant did not experience an effectiveness or safety outcome, they were censored at the earlier of study end date, date of withdrawal of consent, death (non-fatal outcomes), or maximum follow-up time point determined from any of the following data sources: EHR, CMS, private health insurance claims, or the patient portal (last point of contact). The censoring date for EHR data was the site-specific censoring date, which was determined by the PCORnet Distributed Research Network Operations Center based on the availability and completeness of the data. For most sites, this was June 30, 2020. The censoring date for CMS was the minimum of the end of enrollment in fee-for-service or March 31, 2020. The censoring date for private health insurance claims was the minimum of the end of enrollment or June 30, 2020.

### **Sample Size Calculations**

The original trial sample size of 20,000 participants was chosen to provide 85% power to detect a 15% relative risk reduction assuming a primary effectiveness outcome rate of 5% per year in the higher-risk arm. In 2017, the sample size was re-evaluated by the Coordinating Center (with PCORI oversight) using data on trial recruitment rates and blinded, aggregate event rates, and the trial size was reduced to 15,000 participants. The decision to reduce sample size in 2017 was based on a number of factors including slower than expected recruitment, longer duration of follow-up for participants who joined early in the process of the study, and a fixed amount of funding that would not permit longer enrollment. Utilizing blinded data with updated event-rate assumptions in 2019, study follow-up was extended for an additional 6 months due to lower-than-expected aggregate event rates. Final power calculations determined that a trial with 15,000 participants would have at least 88% power to detect a 15% relative risk reduction in the primary outcome, assuming an annualized event rate of 4.6% in the higher-risk arm and a maximum follow-up of 50 months.

### **Sensitivity Analyses**

We performed a series of sensitivity analyses to assess robustness of primary analyses.

- Prior aspirin dose (Table S8): We conducted a 10-day landmark analysis excluding events occurring in the first 10 days following randomization to account for the expected time period of washout from the pre-randomization aspirin dose. If a participant experienced an event during the first 10 days of the trial, they were not included in the analysis. For all other participants, their time to event or censor was adjusted by 10 days.

- Nonadherence (Table S8): We replaced the randomized treatment variable with time-varying participant-reported aspirin dose in the primary analysis Cox model. We used all reported information from one completed visit to the next. Dose was only missing if the participant never reported current aspirin dose after randomization (4.0% in 81 mg arm, 5.8% in 325 mg arm). These participants were excluded from the model. We assumed that participants were continuing the last reported dose until reported otherwise. Missing visits would have resulted in a lag in timing of dose switching included in the model. We may have also missed dose switching that occurred after last reported aspirin dose (8.3% of 81 mg arm and 9.9% of 325 mg arm were alive at the end of the study but did not complete an end-of-study visit).
- COVID-19: We ran the primary analysis Cox model with all follow-up censored for the primary efficacy endpoint on December 31, 2019 the original study end date and prior to COVID-19 entering the United States.
- Under-reporting of events (Figure S7): We conducted two sets of sensitivity analyses to assess robustness of primary analysis inference to underreporting of the primary endpoint due to participants moving or seeking care outside of the CDM health system.
  - We repeated the primary analysis modifying the censoring rules for EHR data such that the EHR censoring date was the last date the patient encountered the health system. This included inpatient and outpatient visits, labs, vitals and prescription medication fills. All other censoring dates remained the same.
  - We conducted a tipping point analysis to identify how many events would have to have been missed to achieve significance. For participants at risk of under-reporting as defined by available endpoint data, events were added sequentially. For each iteration, 1000 events were randomly generated from a Weibull model fit to the entire ITT population. Event times generated beyond the participant's censoring time were censored and not imputed. A Cox model as specified for the primary analysis was fit to the resulting dataset and treatment effect hazard ratio estimated, with standard errors adjusted using standard multiple imputation combining rules. Events were added until the lower limit of the 95% CI for the HR of the treatment effect crossed 1.0 or the number of participants at risk of underreporting was reached.
- Misclassification of events (Figure S8): We conducted two sets of sensitivity analyses to assess robustness of primary analysis inference to misclassification of events based on electronic phenotype definitions.
  - We repeated the primary analysis modifying the code-based definitions of primary endpoints to include codes in any position.

- We conducted a tipping point analysis to identify combinations of positive predictive value (PPV) and negative predictive value (NPV) that would have changed primary inference. PPV and NPV were varied from 0.5 to 1 to reclassify primary endpoints for those participants at risk of misclassification as defined by available endpoint data. For each combination of PPV and NPV, the corresponding number of reclassified events were imputed 1000 times. Reclassified events were randomly selected and set to non-events. Reclassified non-events were generated from a Weibull model fit to the entire ITT population. A Cox model as specified for the primary analysis was fit to the resulting dataset and treatment effect hazard ratio estimated, with standard errors adjusted using standard multiple imputation combining rules. The heat map represents p-values obtained from the Cox models.

### **Reasons for Discontinuation**

We collected the reasons for permanent discontinuation in participants who reported this in the patient portal or via the Call Center. In the group randomized to 81 mg of daily aspirin, 65 (18.6%) reported patient preference, 74 (21.2%) reported need for oral anticoagulant, 18 (5.2%) reported bleeding or bruising, 102 (29.2%) reported other medical condition, 33 (9.5%) cited the primary prevention studies or ACC/AHA guidelines, and 57 (16.3%) reported “Other” as reasons to discontinue aspirin. In the group randomized to 325 mg of daily aspirin, 84 (15.9%) reported patient preference, 110 (20.8%) reported need for oral anticoagulant, 24 (4.5%) reported bleeding or bruising, 204 (38.6%) reported other medical condition, 36 (6.8%) cited the primary prevention studies or ACC/AHA guidelines, and 70 (13.3%) reported “Other” as reasons to discontinue aspirin.

**Table S1. Site Enrollment and Number of Participants Randomized to Each Study Group**

| <b>Site</b>                         | <b>Total Participants<br/>Randomized</b> | <b>Randomized to<br/>81mg</b> | <b>Randomized to<br/>325mg</b> |
|-------------------------------------|------------------------------------------|-------------------------------|--------------------------------|
| Vanderbilt University               | 2,288                                    | 1,126                         | 1,162                          |
| Duke University                     | 1,684                                    | 856                           | 828                            |
| Ochsner                             | 774                                      | 398                           | 376                            |
| University of Kansas Medical Center | 738                                      | 338                           | 400                            |
| University of Florida Gainesville   | 694                                      | 342                           | 352                            |
| University of Pittsburgh            | 678                                      | 326                           | 352                            |
| University of Iowa                  | 606                                      | 306                           | 300                            |
| UNC Chapel Hill                     | 585                                      | 298                           | 287                            |
| Medical College of Wisconsin        | 524                                      | 271                           | 253                            |
| Montefiore Medical Center           | 516                                      | 259                           | 257                            |
| Mayo Clinic                         | 500                                      | 250                           | 250                            |
| University of Utah                  | 464                                      | 220                           | 244                            |
| Essentia Health                     | 449                                      | 228                           | 221                            |
| University of Michigan              | 434                                      | 215                           | 219                            |
| Wake Forest                         | 409                                      | 209                           | 200                            |
| Johns Hopkins                       | 370                                      | 188                           | 182                            |
| HealthCore                          | 357                                      | 177                           | 180                            |
| Marshfield Clinic                   | 321                                      | 174                           | 147                            |
| Intermountain Medical Center        | 290                                      | 136                           | 154                            |
| Penn State University               | 275                                      | 140                           | 135                            |
| Weill Cornell Medical College       | 258                                      | 138                           | 120                            |
| University of Chicago               | 245                                      | 115                           | 130                            |
| Northwestern Medical                | 203                                      | 101                           | 102                            |

|                                                 |               |              |              |
|-------------------------------------------------|---------------|--------------|--------------|
| Indiana University                              | 180           | 98           | 82           |
| Baylor Scott and White                          | 179           | 100          | 79           |
| University of Missouri                          | 178           | 92           | 86           |
| University of Nebraska Med Ctr                  | 139           | 71           | 68           |
| University of California Los Angeles            | 131           | 64           | 67           |
| Rush                                            | 113           | 55           | 58           |
| Allina Health System                            | 110           | 52           | 58           |
| Ohio State University                           | 91            | 42           | 49           |
| Temple University                               | 86            | 46           | 40           |
| Florida Hospital                                | 66            | 33           | 33           |
| University of Texas Health Sciences San Antonio | 35            | 19           | 16           |
| New York University Langone Medical Center      | 34            | 14           | 20           |
| University of Texas Southwestern                | 26            | 16           | 10           |
| Mount Sinai Health System                       | 22            | 13           | 9            |
| Orlando Health                                  | 11            | 6            | 5            |
| Bond Community Health Center                    | 8             | 5            | 3            |
| Tulane                                          | 5             | 3            | 2            |
| <b>Grand Total</b>                              | <b>15,076</b> | <b>7,540</b> | <b>7,536</b> |

**Table S2. Expected study encounters and cumulative encounter completion rate**

|                                          | <b>Overall</b> |
|------------------------------------------|----------------|
| Expected                                 | 123978         |
| Died before end of follow-up             | 672            |
| Withdrew consent before end of follow-up | 614            |
| Cumulative visit completion rate*        |                |
| 0%                                       | 684 (5%)       |
| 1-25%                                    | 754 (5%)       |
| 26-50%                                   | 1701 (11%)     |
| 51-75%                                   | 4400 (29%)     |
| 75-99%                                   | 6523 (43%)     |
| 100%                                     | 1013 (7%)      |

\*Cumulative visit completion rate is reported at the participant level and reflects the % of expected visits for a given participant that were completed. Expected visits are defined using the time from randomization to end of study and the randomized follow-up strata. Values sum to 15075 due to one participant dying prior to the week 1 visit.

**Table S3. Data Availability for study participants during the course of the study**

| Scenario | Data sources available |     |                               | N     |
|----------|------------------------|-----|-------------------------------|-------|
|          | Self-report            | EHR | Claims<br>(CMS or<br>Private) |       |
| 1        | X                      |     |                               | 39    |
| 2        | X                      | X   |                               | 8591  |
| 3        | X                      |     | X                             | 275   |
| 4        | X                      | X   | X                             | 4456  |
| 5        |                        | X   |                               | 1402  |
| 6        |                        |     | X                             | 84    |
| 7        |                        | X   | X                             | 212   |
| 8        |                        |     |                               | 17    |
| Overall  |                        |     |                               | 15076 |

“Data available” indicates that data was available for at least half of available follow-up for each data source.



**Table S4. Data source where primary effectiveness end point was captured, based on treatment group**

|                                                            | <b>81 mg dose<br/>(N=7540)</b> | <b>325 mg dose<br/>(N=7536)</b> |
|------------------------------------------------------------|--------------------------------|---------------------------------|
| Number of participants with primary effectiveness endpoint | 590                            | 569                             |
| Event source <sup>[1]</sup>                                |                                |                                 |
| EHR/claims/PRO                                             | 5/590 (0.8%)                   | 7/569 (1.2%)                    |
| EHR/PRO                                                    | 16/590 (2.7%)                  | 16/569 (2.8%)                   |
| Claims/PRO                                                 | 8/590 (1.4%)                   | 1/569 (0.2%)                    |
| EHR/Claims                                                 | 145/590 (24.6%)                | 168/569 (29.5%)                 |
| EHR only                                                   | 264/590 (44.7%)                | 242/569 (42.5%)                 |
| Claims only                                                | 97/590 (16.4%)                 | 90/569 (15.8%)                  |
| PRO only*                                                  | 55/590 (9.3%)                  | 45/569 (7.9%)                   |

\*For end points that were captured only by patient-report, an end point reconciliation process was used and health information was collected to support the end point confirmation.

**Table S5. Characteristics of participants at baseline**

| <b>Characteristics</b>                       | <b>81 mg Aspirin<br/>(N=7540)</b> | <b>325 mg Aspirin<br/>(N=7536)</b> |
|----------------------------------------------|-----------------------------------|------------------------------------|
| Age, median, (25th, 75th), yrs               | 67.7 (60.7, 73.6)                 | 67.5 (60.7, 73.5)                  |
| Female sex, no. (%)                          | 2307 (30.6%)                      | 2417 (32.1%)                       |
| Weight, median (25th, 75th), kg              | 90.0 (78.6, 103.6)                | 90.0 (78.2, 104.1)                 |
| Race, no. (%)                                |                                   |                                    |
| White                                        | 6014 (79.8%)                      | 5976 (79.3%)                       |
| Black or African American                    | 664 (8.8%)                        | 647 (8.6%)                         |
| Asian                                        | 82 (1.1%)                         | 64 (0.8%)                          |
| American Indian or Alaska Native             | 69 (0.9%)                         | 45 (0.6%)                          |
| Multiple races                               | 71 (0.9%)                         | 63 (0.8%)                          |
| Prefer not to say                            | 435 (5.8%)                        | 545 (7.2%)                         |
| Other                                        | 205 (2.7%)                        | 196 (2.6%)                         |
| Ethnicity, no. (%)                           |                                   |                                    |
| Hispanic                                     | 249 (3.3%)                        | 232 (3.1%)                         |
| Non-Hispanic                                 | 6816 (90.4%)                      | 6737 (89.4%)                       |
| Prefer not to say                            | 475 (6.3%)                        | 567 (7.5%)                         |
| Medical history, no. (%)                     |                                   |                                    |
| Prior myocardial infarction                  | 2674 (35.6%)                      | 2631 (35.0%)                       |
| Prior coronary revascularization             | 4034 (53.6%)                      | 3943 (52.4%)                       |
| Prior percutaneous coronary intervention     | 3005 (40.0%)                      | 2941 (39.1%)                       |
| Prior coronary artery bypass graft surgery   | 1786 (23.8%)                      | 1741 (23.2%)                       |
| Hypertension                                 | 6264 (83.3%)                      | 6248 (83.1%)                       |
| Dyslipidemia                                 | 6472 (86.1%)                      | 6474 (86.1%)                       |
| Diabetes mellitus                            | 2820 (37.5%)                      | 2856 (38.0%)                       |
| Atrial fibrillation                          | 605 (8.0%)                        | 628 (8.4%)                         |
| Cerebrovascular disease                      | 1324 (17.6%)                      | 1300 (17.3%)                       |
| Congestive heart failure                     | 1718 (22.8%)                      | 1786 (23.8%)                       |
| Chronic obstructive pulmonary disease/Asthma | 1339 (17.8%)                      | 1439 (19.1%)                       |
| Chronic kidney disease                       | 1315 (17.5%)                      | 1333 (17.7%)                       |
| Peripheral artery disease                    | 1706 (22.7%)                      | 1787 (23.8%)                       |
| Prior history of bleeding                    |                                   |                                    |
| Significant bleeding disorder                | 80 (1.1%)                         | 96 (1.3%)                          |
| Prior significant gastrointestinal bleed     | 455 (6.1%)                        | 495 (6.6%)                         |
| Prior intracranial hemorrhage                | 98 (1.3%)                         | 110 (1.5%)                         |

|                                                                       |                   |                   |
|-----------------------------------------------------------------------|-------------------|-------------------|
| Peptic ulcer disease                                                  | 230 (3.1%)        | 215 (2.9%)        |
| Tobacco use, no. (%)                                                  |                   |                   |
| Current smoker                                                        | 696 (9.2%)        | 686 (9.1%)        |
| Missing                                                               | 404 (5.4%)        | 569 (7.6%)        |
| Medications at the time of randomization, no. (%)                     |                   |                   |
| Aspirin use before study                                              |                   |                   |
| Missing                                                               | 404 (5.4%)        | 569 (7.6%)        |
| No                                                                    | 286 (3.8%)        | 280 (3.7%)        |
| Yes                                                                   | 6850 (90.8%)      | 6687 (88.7%)      |
| 81 mg                                                                 | 5823/6850 (85.0%) | 5724/6687 (85.6%) |
| 162 mg                                                                | 168/6850 (2.5%)   | 142/6687 (2.1%)   |
| 325 mg                                                                | 845/6850 (12.3%)  | 812/6687 (12.1%)  |
| Clopidogrel                                                           | 1448 (20.7%)      | 1401 (20.5%)      |
| Prasugrel                                                             | 108 (1.5%)        | 95 (1.4%)         |
| Other antiplatelet medication (Ticlopidine,<br>Vorapaxar, Cilostazol) | 27 (0.3%)         | 28 (0.4%)         |

---

A total of 15039/15076 participants (99.8%) had available medical history via electronic health record data. Age, sex, race, ethnicity, tobacco use, and medication use prior to randomization were reported by the participants.

**Table S6. Treatment effect on participant-reported quality of life over time**

|                                               | 81 mg |                 | 325 mg |                 |
|-----------------------------------------------|-------|-----------------|--------|-----------------|
|                                               | N     | Mean Score (SE) | N      | Mean Score (SE) |
| <b>Describe current health*</b>               |       |                 |        |                 |
| Randomization                                 | 7540  | 3.27 (0.010)    | 7536   | 3.25 (0.010)    |
| Month 6                                       | 5980  | 3.26 (0.009)    | 5677   | 3.24 (0.010)    |
| Year 1                                        | 5346  | 3.25 (0.010)    | 5059   | 3.23 (0.010)    |
| Month 18                                      | 4264  | 3.24 (0.010)    | 4054   | 3.22 (0.010)    |
| Year 2                                        | 3039  | 3.23 (0.011)    | 2860   | 3.20 (0.011)    |
| <b>Able to run errands and shop*</b>          |       |                 |        |                 |
| Randomization                                 | 7540  | 4.46 (0.010)    | 7536   | 4.47 (0.010)    |
| Month 6                                       | 5977  | 4.43 (0.009)    | 5667   | 4.44 (0.009)    |
| Year 1                                        | 5339  | 4.40 (0.010)    | 5056   | 4.40 (0.010)    |
| Month 18                                      | 4262  | 4.38 (0.010)    | 4050   | 4.37 (0.010)    |
| Year 2                                        | 3040  | 4.35 (0.011)    | 2859   | 4.34 (0.012)    |
| <b>In the past 7 days, I felt depressed**</b> |       |                 |        |                 |
| Randomization                                 | 7540  | 1.66 (0.010)    | 7536   | 1.67 (0.010)    |
| Month 6                                       | 5975  | 1.67 (0.009)    | 5669   | 1.68 (0.009)    |
| Year 1                                        | 5339  | 1.68 (0.009)    | 5059   | 1.69 (0.009)    |
| Month 18                                      | 4255  | 1.68 (0.009)    | 4053   | 1.70 (0.010)    |
| Year 2                                        | 3037  | 1.69 (0.010)    | 2857   | 1.70 (0.011)    |
| <b>In the past 7 days, I felt fatigued**</b>  |       |                 |        |                 |
| Randomization                                 | 7540  | 2.23 (0.011)    | 7536   | 2.23 (0.011)    |
| Month 6                                       | 5975  | 2.23 (0.010)    | 5672   | 2.24 (0.010)    |
| Year 1                                        | 5338  | 2.24 (0.010)    | 5053   | 2.25 (0.010)    |
| Month 18                                      | 4260  | 2.25 (0.011)    | 4050   | 2.26 (0.011)    |
| Year 2                                        | 3037  | 2.25 (0.012)    | 2861   | 2.27 (0.012)    |

| In the past 7 days, I had problems with sleep**              |      |              |      |              |
|--------------------------------------------------------------|------|--------------|------|--------------|
| Randomization                                                | 7540 | 2.05 (0.011) | 7536 | 2.07 (0.011) |
| Month 6                                                      | 5972 | 2.05 (0.010) | 5669 | 2.08 (0.010) |
| Year 1                                                       | 5334 | 2.06 (0.010) | 5055 | 2.09 (0.010) |
| Month 18                                                     | 4258 | 2.06 (0.011) | 4049 | 2.10 (0.011) |
| Year 2                                                       | 3038 | 2.06 (0.012) | 2858 | 2.10 (0.012) |
| Trouble doing regular activities*                            |      |              |      |              |
| Randomization                                                | 7540 | 4.19 (0.010) | 7536 | 4.20 (0.010) |
| Month 6                                                      | 5977 | 4.19 (0.010) | 5674 | 4.18 (0.010) |
| Year 1                                                       | 5337 | 4.18 (0.010) | 5054 | 4.16 (0.010) |
| Month 18                                                     | 4263 | 4.17 (0.010) | 4043 | 4.14 (0.011) |
| Year 2                                                       | 3037 | 4.16 (0.012) | 2858 | 4.12 (0.012) |
| In the past 7 days, pain interfered with normal activities** |      |              |      |              |
| Randomization                                                | 7540 | 2.00 (0.012) | 7536 | 2.02 (0.012) |
| Month 6                                                      | 5980 | 2.01 (0.011) | 5676 | 2.04 (0.011) |
| Year 1                                                       | 5344 | 2.03 (0.011) | 5060 | 2.06 (0.011) |
| Month 18                                                     | 4263 | 2.04 (0.011) | 4054 | 2.08 (0.012) |
| Year 2                                                       | 3039 | 2.06 (0.013) | 2862 | 2.10 (0.013) |

Responses are scored on a Likert scale from 1 to 5., with 5 indicating the best health.

\* Higher scores are better.

\*\* Lower scores are better.

**Table S7. Primary effectiveness end point based on secondary randomization group (3 months vs. 6 months of follow-up)**

|                    | <b>81 mg<br/>N (Rate)<sup>[1]</sup></b> | <b>325 mg<br/>N (Rate)<sup>[1]</sup></b> | <b>Hazard ratio<br/>81 mg vs 325 mg<br/>(95% CI)</b> |
|--------------------|-----------------------------------------|------------------------------------------|------------------------------------------------------|
| Follow-up interval |                                         |                                          |                                                      |
| 3 months           | 279 (6.8%)                              | 297 (7.8%)                               | 0.92 (0.78 - 1.08)                                   |
| 6 months           | 311 (7.7%)                              | 272 (7.2%)                               | 1.13 (0.96 - 1.33)                                   |

CI, confidence interval.

Rates are calculated at median follow-up (26.2 months) using the Kalbfleisch & Prentice cumulative incidence function estimator. Events include data from electronic health record data, CMS claims, private insurance claims and confirmed participant reported outcomes (PROs). The hazard ratios (HR) reflect comparisons between 81mg with 325mg, such that HR >1 indicate higher event rates in the 81mg group.

**Table S8. Sensitivity analyses to assess impact of prior aspirin dose, non-adherence, COVID-19, and under-reporting of events and misclassification of events on the primary effectiveness end point**

| Outcome                                                       | 81 mg<br>N (Rate)                      | 325 mg<br>N (Rate)                     | HR (95% CI)<br>81mg mg vs 325mg mg |
|---------------------------------------------------------------|----------------------------------------|----------------------------------------|------------------------------------|
| Impact of prior aspirin dose -- Landmark Analysis at 10 Days* |                                        |                                        |                                    |
| Death/MI/Stroke                                               | 583 (7.3%)                             | 560 (7.5%)                             | 1.02 (0.91 - 1.15)                 |
| Impact of COVID-19                                            |                                        |                                        |                                    |
| Death/MI/Stroke                                               | 462 (7.5%)                             | 457 (7.6%)                             | 1.00 (0.88 – 1.14)                 |
| Impact of non-adherence†                                      |                                        |                                        |                                    |
| Death/MI/Stroke                                               | 673 (3.6 events per 100 patient-years) | 321 (2.9 events per 100 patient-years) | 1.25 (1.10 - 1.43)                 |
| Impact of Under-Reporting of Events                           |                                        |                                        |                                    |
| Death/MI/Stroke                                               | 590 (7.6%)                             | 569 (7.9%)                             | 1.02 (0.91 - 1.14)                 |
| Impact of Misclassification of Events*                        |                                        |                                        |                                    |
| Death/MI/Stroke                                               |                                        |                                        |                                    |
| Primary Diagnosis                                             | 533 (6.6%)                             | 517 (6.8%)                             | 1.01 (0.90 – 1.14)                 |
| Position Only                                                 |                                        |                                        |                                    |
| All Diagnosis Positions                                       | 650 (8.1%)                             | 629 (8.4%)                             | 1.01 (0.91 – 1.13)                 |

Events include data from electronic health record data, CMS claims, private insurance claims and confirmed participant reported outcomes (PROs). The hazard ratios (HR) reflect comparisons between 81mg with 325mg, such that HR >1 indicate higher event rates in the 81mg group.

\*Rates are calculated at median follow-up (26.2 months) using the Kalbfleisch & Prentice cumulative incidence function estimator.

†Rates and HR reflect the effect of the time-varying reported dose on the primary effectiveness end point. Rates are calculated as annualized event rates (events per 100 patient-years).

**Figure S1. End point ascertainment and confirmation for non-fatal events**

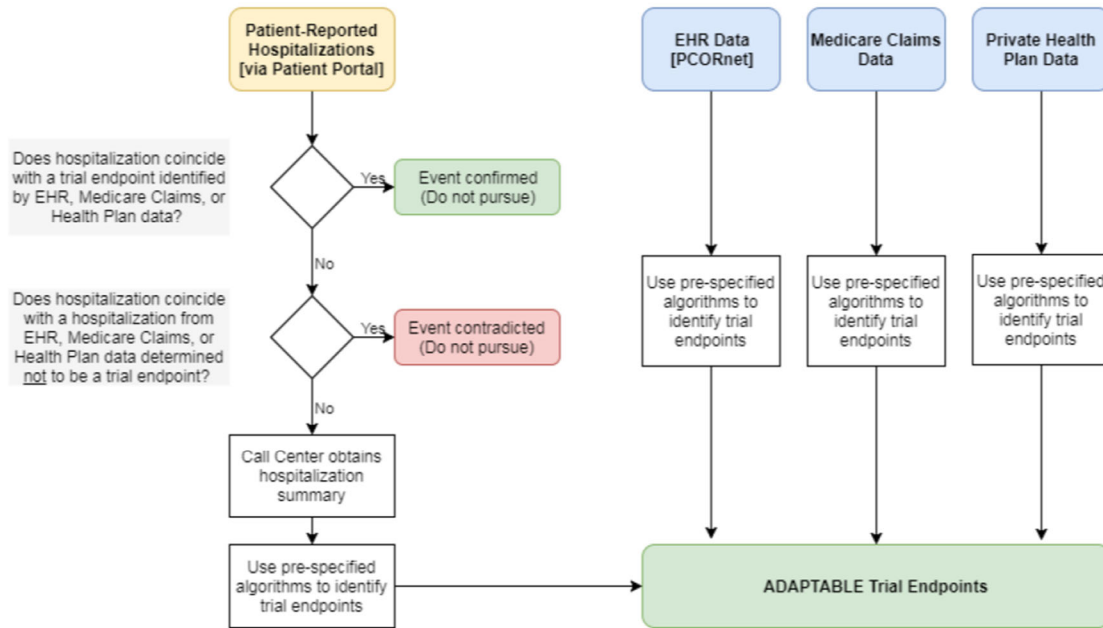

End points were identified through electronic sources (including EHR data, CMS claims or private insurance claims data) or patient reported via the patient portal. When participants reported events via the patient portal or Call Center, the initial step was to match those events with data from electronic sources. If the event was confirmed as a study end point, the patient-reported event was not pursued further. If the patient-reported event was also identified via electronic data sources but was not confirmed as a study end point (eg, the hospitalization did not qualify as an end point), the patient-reported event was not pursued further. If the patient-reported event was not identified via electronic data sources, then the Call Center was activated to contact the patient, obtain authorization for release of medical records, and then contact the health system where medical care occurred. A review of the hospital billing codes was then performed to confirm or refute the non-fatal end point. Some clinical end points required medical record review if billing codes were not available or unclear.



**Figure S2. Participant data availability over trial follow-up**

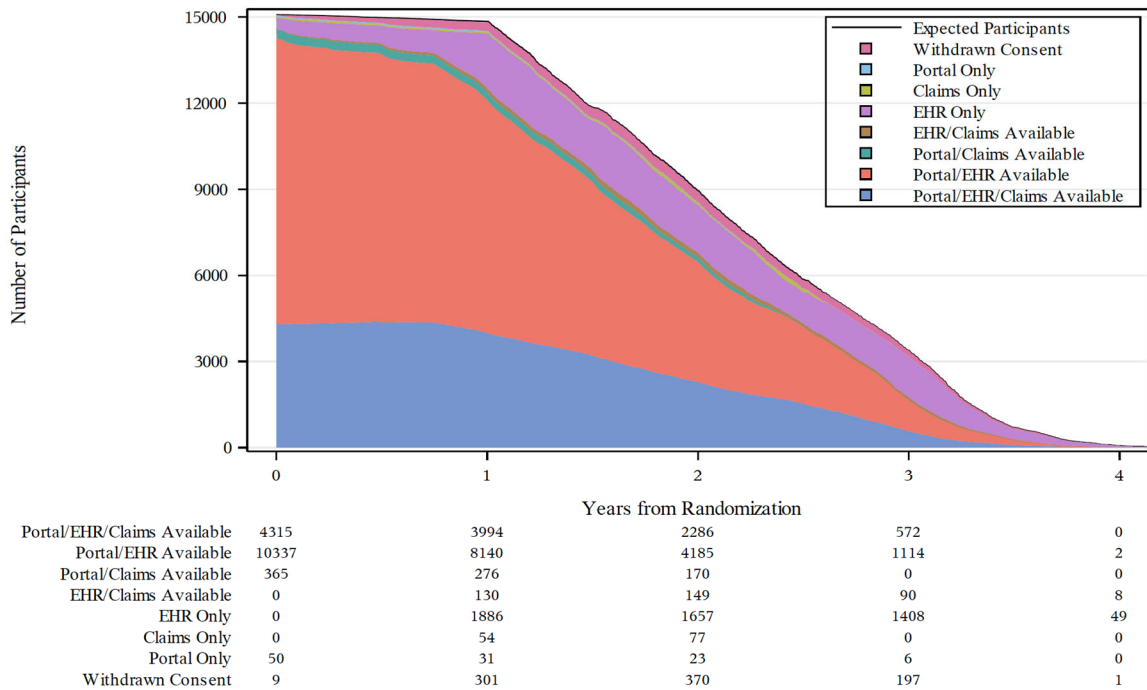

Six hundred eighty-three participants enrolled in CMS after randomization, and 116 participants enrolled in private insurance after randomization. Sixty-seven participants were missing a start date for private insurance enrollment. Randomization date was used as a surrogate. Fourteen CMS participants had a break in coverage for a median of 62 days. Sixteen health plan participants had a break in coverage for a median of 366 days.

The height of the figure corresponds to the expected number of participants at a given time since randomization. Drop-off after Year 1 reflects staggered enrollment and censoring at June 30, 2020.

**Figure S3. Randomization, treatment, and follow-up of participants**

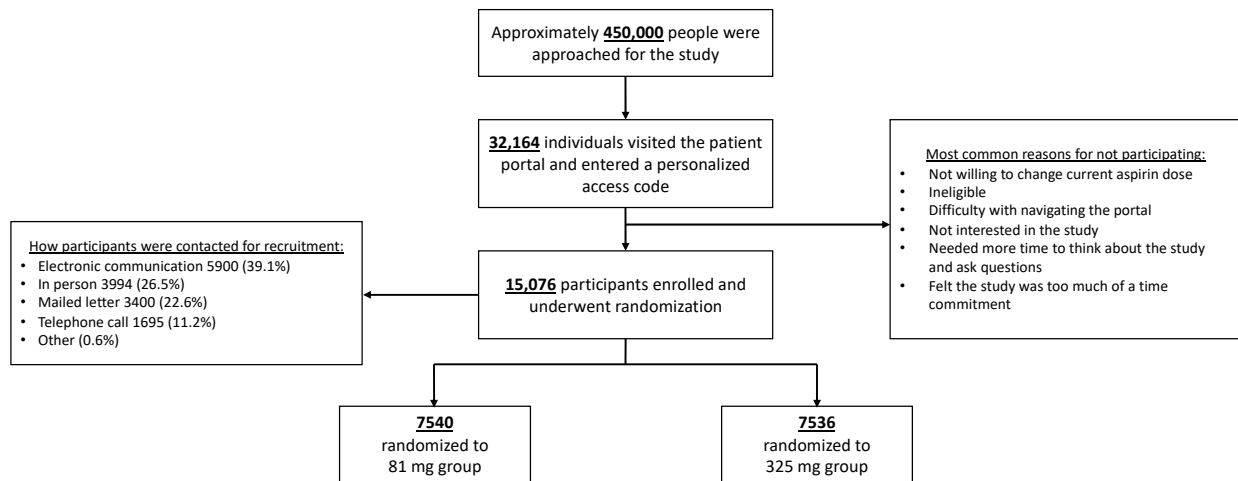

Top reasons participants visited the portal but did not enroll included: Not willing to change their current aspirin dose; ineligible; difficulty with navigating the portal; not interested in the study; needed more time to think about the study and ask questions; and felt the study was too much of a time commitment.

For participants who withdrew consent from the trial, all information up to the point of withdrawal was included in the analyses. Vital status was ascertained after trial closure via multiple methods including electronic health record review, telephone calls from the Call Center, and internet searches.

**Figure S4. Time-to-event curves for all-cause mortality**

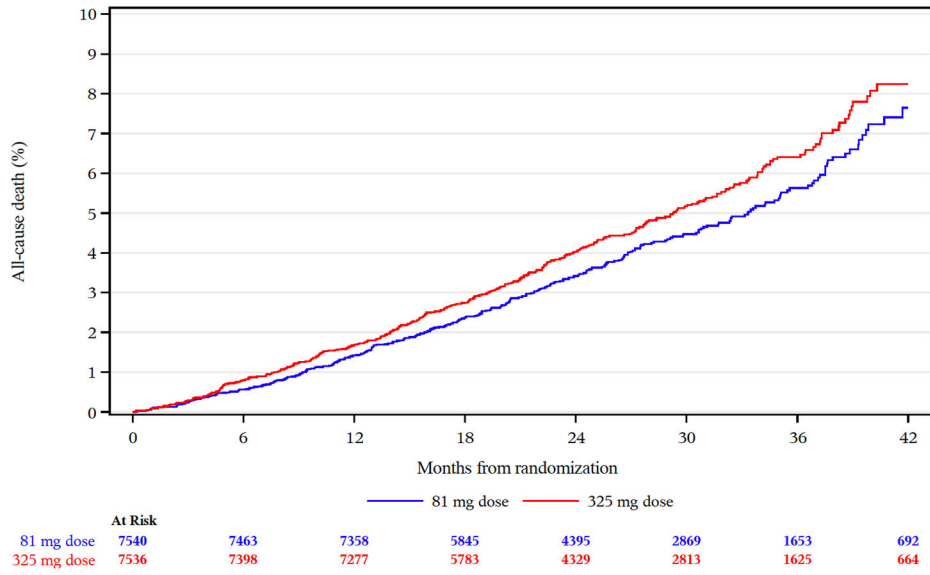

Cumulative incidence of all-cause mortality reported in each treatment group.

**Figure S5. Analyses of heterogeneity of treatment effect for the primary effectiveness outcome**

**Primary Efficacy Subgroup Analysis for Protocol Defined Death/MI/Stroke by Randomized Treatment Groups  
Participant Self-Reported, EHR and Claims Data**

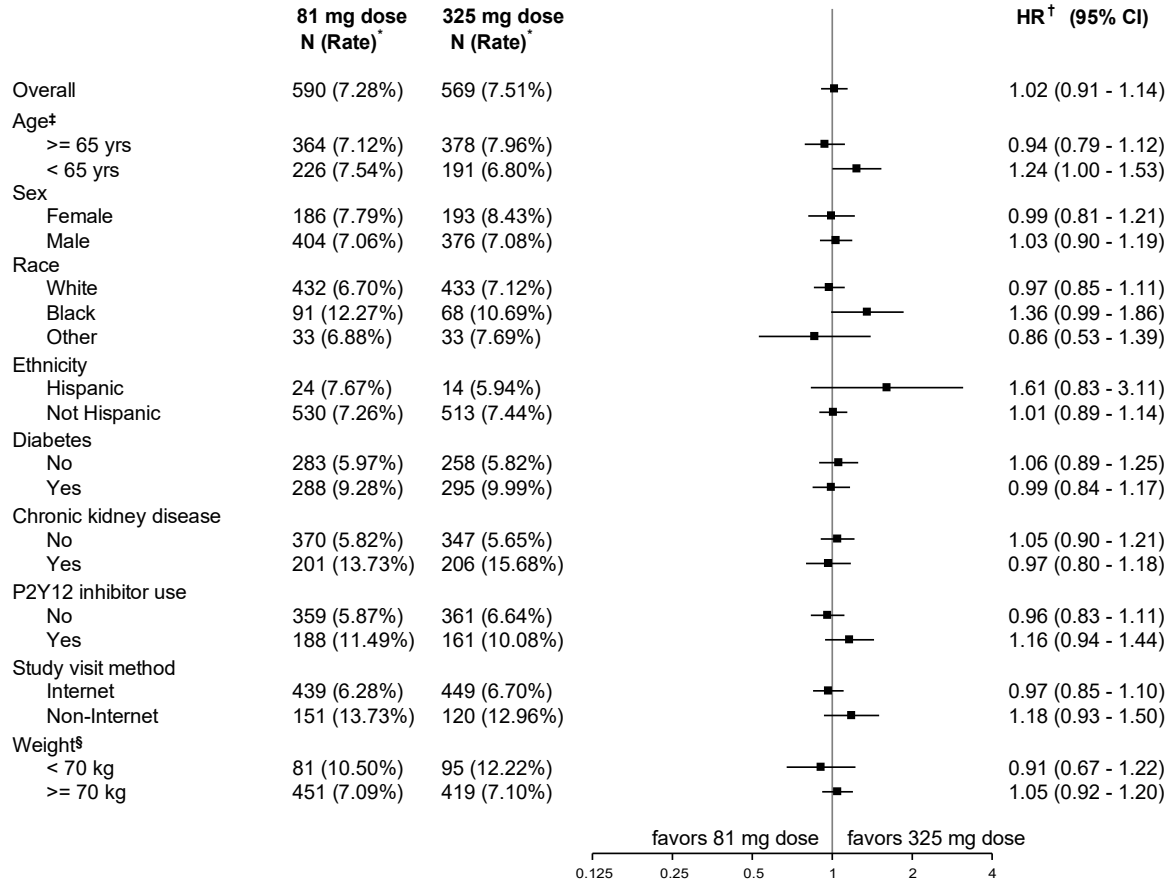

\* N represents the total number of events over follow-up. Rates are calculated at median follow-up (26.2 months) using the Kalbfleisch & Prentice CIF estimator. Events include data from EHR, CMS claims, private insurance claims and confirmed participant reported outcomes (PROs).

† Hazard ratios are obtained from a Cox proportional hazards model fit with randomized aspirin dose, subgroup and the dose by subgroup interaction. Hazard ratios compare 81 mg to 325 mg within each subgroup level. The interaction p-value is derived using the Wald chi-square statistic.

‡ Age was non-linearly associated with the primary endpoint, and was modeled using restricted cubic splines with knots at the 5th, 35th, 65th and 95th percentiles.

§ The hazard ratio comparing 81 mg to 325 mg is presented for age=60 (age < 65) and age=70 (age ≥ 65).

¶ Analysis of this subgroup was not pre-specified.

**Figure S6. Adherence to randomized study dose over time**

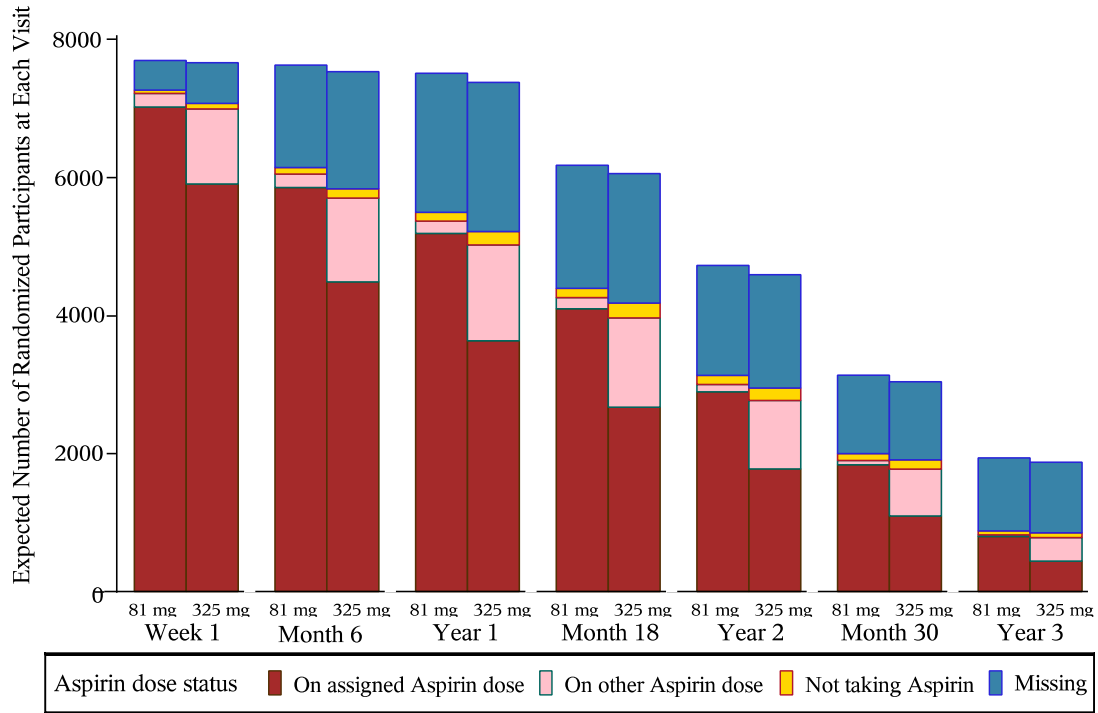

Study medication adherence was ascertained at every visit to the patient portal or via the Call Center. Red represents those participants that were adherent to the randomized study dose. Pink represents those participants that were taking a different dose than the randomized study dose. Yellow represents those participants that were not taking aspirin at the time of the encounter. Blue represents those participants with missing dose information at each visit.

**Figure S7. Sensitivity analysis to assess impact of under-reporting of events on primary efficacy analysis**

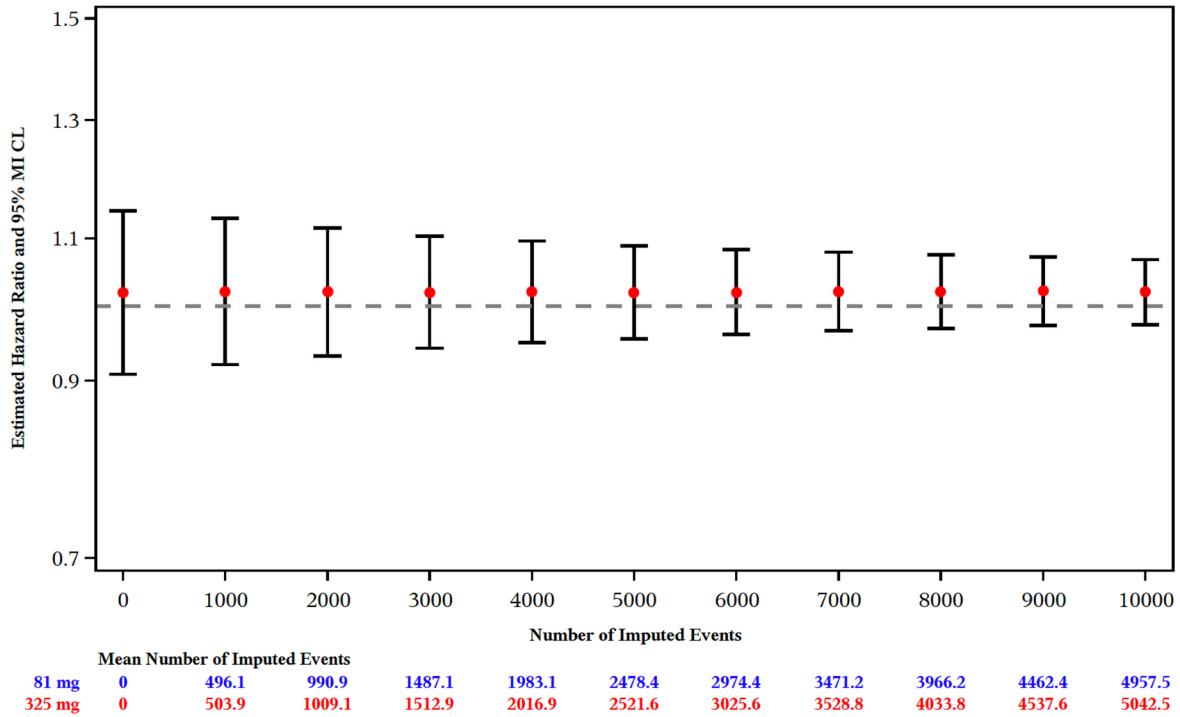

The results of the tipping point analysis to assess impact of under-reporting of events on the primary efficacy analysis are reported as HRs (red dots, 81 mg vs 325 mg) and corresponding 95% confidence intervals (error bars). The HR and CI with Number of Imputed Events = 0 corresponds to the primary efficacy analysis. Events were added (and imputed 1000 times) in increments of 1000 until the number of participants at risk of under-reporting was reached. This analysis assumes that under-reporting was non-differential between randomized aspirin dose groups (i.e. the impact of under-reporting is loss of power, not bias), so the HR point estimate was consistently very close to 1.0 as in the primary result. Imputed event times beyond the participant’s censoring time were censored and not imputed; the Mean Number of Imputed Events reflects those event times that were included in the sensitivity analysis.

The confidence interval limits never crossed the significance threshold.

**Figure S8. Sensitivity analysis to assess impact of misclassification of events on primary efficacy analysis**

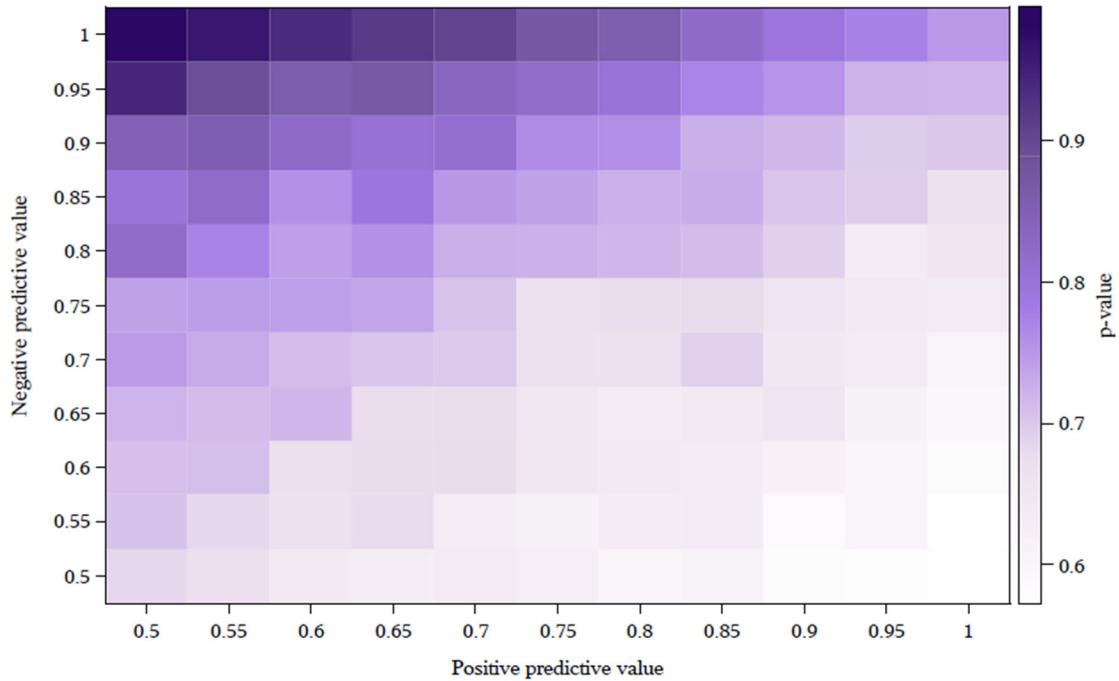

The results of the tipping point analysis to assess impact of misclassification of events on the primary efficacy analysis are reported as p-values represented in this heat map. Positive predictive value (PPV) and negative predictive value (NPV) were varied from 0.5 to 1 to reclassify primary efficacy endpoints for those participants at risk of misclassification as defined by available endpoint data. The p-values were generated from a test of the randomized treatment effect based on a Cox model as specified for the primary analysis. The p-value corresponding to PPV=1 and NPV=1 corresponds to the primary efficacy analysis. The point PPV=1 and NPV=.5 represents the greatest number of events in analysis (half of non-events are reclassified to events and no events are reclassified to non-events). The point PPV=.5 and NPV=1 represents the smallest number of events in analysis (no non-events are reclassified to events and half of events are reclassified to non-events). No combination of PPV and NPV in the 0.5 to 1.0 range yielded a change in the results of primary analysis.
