# Supplementary material
Source: PubMed Central journal article supplement (PMC9908069)
Supplement: NIHMS1864598-supplement-Jones_PMID33999548_NEJM_2021_SupplDataSharing.pdf [file NIHMS1864598-supplement-Jones_PMID33999548_NEJM_2021_SupplDataSharing.pdf]

## Data Sharing Statement

Jones WS, Mulder H, Wruck LM, et al. Comparative Effectiveness of Aspirin Dosing in Cardiovascular Disease. *N Engl J Med*. DOI: 10.1056/NEJMoa2102137.

| Question                                                            | Authors' Response                                                                                                          |
|---------------------------------------------------------------------|----------------------------------------------------------------------------------------------------------------------------|
| Will the data collected for your study be made available to others? | Yes                                                                                                                        |
| Would you like to offer context for your decision?                  | —                                                                                                                          |
| Which data?                                                         | —                                                                                                                          |
| Additional information about data                                   | —                                                                                                                          |
| How or where can the data be obtained?                              | Requests should be directed to W. Schuyler Jones at <a href="mailto:schuyler.jones@duke.edu">schuyler.jones@duke.edu</a> . |
| When will data availability begin?                                  | 12 months after submission of the final study report to PCORI                                                              |
| When will data availability end?                                    | —                                                                                                                          |
| Will any supporting documents be available?                         | —                                                                                                                          |
| Which supporting documents?                                         | —                                                                                                                          |
| Additional information about supporting documents                   | —                                                                                                                          |
| How or where can supporting documents be obtained?                  | —                                                                                                                          |
| When will supporting documents availability begin?                  | —                                                                                                                          |
| When will supporting documents availability end?                    | —                                                                                                                          |
| To whom will data be available?                                     | —                                                                                                                          |
| For what type of analysis or purpose?                               | —                                                                                                                          |
| By what mechanism?                                                  | —                                                                                                                          |
| Any other restrictions?                                             | —                                                                                                                          |
| Additional information                                              | —                                                                                                                          |

This statement was posted on May 15, 2021, at [NEJM.org](https://www.nejm.org).
